# Supplementary material for: Ecological Status of Algeciras Bay, in a Highly Anthropised Area in South-West Europe, through Metal Assessment—Part I: Abiotic Samples
Source: MDPI journal article supplement (doi:10.3390/toxics12030163), 2024-02-20
Supplement: s1 [file s1]

## **Supplementary Material**

### **Ecological Status of Algeciras Bay, in a Highly Anthropised Area in South-West Europe, through Metal Assessment—Part I: Abiotic Samples**

María José Casanueva-Marengo, María Dolores Galindo-Riaño \*, María Dolores Granado-Castro  
and Margarita Díaz-de-Alba

Department of Analytical Chemistry, Institute of Biomolecules (INBIO), Faculty of Sciences,  
International Campus of Excellence of the Sea (CEI-MAR), University of Cadiz, Campus Rio  
San Pedro, 11510 Puerto Real, Cadiz, Spain; mariajose.casanueva@uca.es (M.J.C.-M.);  
dolores.granado@uca.es (M.D.G.-C.); margarita.diaz@uca.es (M.D.-d.-A.)

\* Correspondence: dolores.galindo@uca.es; Tel.: +34-956016362

**Table S1.** Geographical coordinates of sampling sites in Algeciras Bay

| Sampling sites     | Coordinates     |                |
|--------------------|-----------------|----------------|
|                    | North           | West           |
| 1 – Getares beach  | 36° 05' 28.31'' | 5° 26' 10.93'' |
| 2 – Isla Verde     | 36° 07' 8.43''  | 5° 25' 37.60'' |
| 3 – Palmones       | 36° 10' 19.51'' | 5° 25' 27.14'' |
| 4 – Guadarranque   | 36° 10' 32.21'' | 5° 24' 27.47'' |
| 5 – Puente Mayorga | 36° 10' 32.23'' | 5° 23' 23.24'' |

**Table S2.** Analytical instruments and equipment used in this study

| Instrument and equipment                                  | Specifications                                                                                                     |
|-----------------------------------------------------------|--------------------------------------------------------------------------------------------------------------------|
| Ultrapure water system                                    | Millipore Milli-Q50 (Millipore, Burlington, Massachusetts, USA) (resistivity of 18.2 M $\Omega$ ·cm at 25 °C)      |
| Peristaltic pump                                          | Masterflex 07571-05, popped head 07518-02, Cole-Parmer Instrument Co., (Vernon Hills, Illinois, USA)               |
| Rigid Teflon pipes and flexible tubing                    | (Tygon, Masterflex, 6406-66).                                                                                      |
| Groundwater filter capsule                                | 0.45 $\mu$ m, Whatman (29705-92, Cole-Parmer Instrument Co., Vernon Hills, Illinois, USA)                          |
| Closed Teflon reactor                                     | (PTFE, 100 mL, BRAND, 1305 38, Wertheim, Germany)                                                                  |
| Electrochemical portable device                           | Model Sension 156 (Hach Co., Loveland, Colorado, USA)                                                              |
| Grab sampler                                              | Model Van Veen grab (KC Denmark, Silkeborg, Denmark)                                                               |
| Vertical laminar flow cabinet (for samples and solutions) | Cruisair 870-FL (Cruma, Saint Boi de Llobregat, Barcelona, Spain)                                                  |
| Fume chamber (for acids and other fuming reagents)        | Waldner 1800 (Wangen im Allgäu, Germany)                                                                           |
| pH-meter                                                  | Basic 20 pH-meter with a 50_10T combined glass-Ag/AgCl electrode (Crison, Barcelona, Spain)                        |
| TOC analyser                                              | Model 5050 (Shimadzu, Columbia, Maryland, USA)                                                                     |
| Nylon filters                                             | 0.45 $\mu$ m (Osmonics, Minnesota, USA)                                                                            |
| Muffle furnace                                            | Model N 20/Hr (Nabertherm, Lilienthal, Germany)                                                                    |
| UV digester                                               | Model 705 (Metrohm, Switzerland)                                                                                   |
| Shaker                                                    | Promax 2020 (Heidolph, Germany)                                                                                    |
| Centrifuge                                                | 4K10 Sigma (Osterode, Germany)                                                                                     |
| Hot water bath                                            | 20 L Precistern (Selecta, Barcelona, Spain)                                                                        |
| Infrared lamps                                            | Siccatherm -SICCA 250 W, 240 V (Osram, Valencia, Spain)                                                            |
| Microwave assisted digester                               | Ethos 1600 (Milestone, Sorisole, Italy)                                                                            |
| Differential Pulse Anodic Stripping Voltameter            | 746 VA Trace Analyzer processor with a Metrohm 747 VA Electrode Stand (Metrohm, Herisau, Switzerland) <sup>a</sup> |
| Inductively coupled plasma-mass spectrometer              | X-Series ICP-MS equipment (Thermo Elemental, Winsford, UK) <sup>b</sup>                                            |

<sup>a</sup> An automated hanging mercury drop electrode as working electrode, an Ag/AgCl reference electrode (saturated with 3 mol/L KCl) and a platinum wire as auxiliary electrode were used.

<sup>b</sup> ICP-MS equipment was calibrated using <sup>71</sup>Ga, <sup>103</sup>Rh and <sup>209</sup>Bi as internal standards in order to minimise matrix interference effects.

**Table S3.** Method detection limits (MDL) (mg/kg) for the analysis of the different samples (n = 10)

| <b>Sample / method</b>                    |    | <b>Zn</b> | <b>Cd</b> | <b>Pb</b> | <b>Cu</b> |
|-------------------------------------------|----|-----------|-----------|-----------|-----------|
| Water / (DPASV)                           |    | 0.66      | 0.01      | 0.04      | 0.25      |
| Sediment: Total content / (ICP-MS)        |    | 0.18      | 0.008     | 0.03      | 0.07      |
| Sediment: BCR fractionation /<br>(ICP-MS) | F1 | 0.02      | 0.002     | 0.02      | 0.01      |
|                                           | F2 | 0.08      | 0.008     | 0.01      | 0.03      |
|                                           | F3 | 0.08      | 0.004     | 0.01      | 0.03      |
|                                           | F4 | 0.14      | 0.008     | 0.02      | 0.04      |

**Table S4.** The 3-step BCR sequential extraction procedure and residue digestion used for sediment fractionation

| Step                 | Procedure                                                                                                                                                                                                                                                                                                                       |
|----------------------|---------------------------------------------------------------------------------------------------------------------------------------------------------------------------------------------------------------------------------------------------------------------------------------------------------------------------------|
| 1                    | 1 g of sediment sample was mechanically shaken with 40 mL of 0.11 mol/L acetic acid ( $\text{CH}_3\text{COOH}$ ) for 16 h at 150 rpm in a Teflon vessel. Separation by centrifugation obtaining the extractable fraction.                                                                                                       |
| 2                    | Residue from Step 1 was shaken with 40 mL of 0.5 mol/L hydroxylammonium chloride ( $\text{NH}_2\text{OH}\cdot\text{HCl}$ ) (adjusted at pH 1.5 by addition of $\text{HNO}_3$ ) for 16 h at 150 rpm. Separation by centrifugation obtaining the reducible fraction.                                                              |
| 3                    | (i) Residue was twice immersed in a water bath at 85 °C with 10 mL of 8.8 mol/L hydrogen peroxide ( $\text{H}_2\text{O}_2$ ).<br>(ii) Extraction using 50 mL of 1 mol/L ammonium acetate ( $\text{CH}_3\text{COONH}_4$ ) adjusted at pH 2 with $\text{HNO}_3$ . Separation by centrifugation obtaining the oxidisable fraction. |
| Residue digestion    | (i) Residual fraction was heated in a Teflon dish by using an IR lamp with 5 mL HF 48% (twice) and then 5 mL $\text{HNO}_3$ 65% (twice), until complete dryness.<br>(ii) Residue was leached by magnetic shaking and heating for 1 h with 20 mL of 3.86 mol/L HCl. This extract was made up to a final volume of 25 mL.         |
| Total acid digestion | The procedure of residue digestion was also carried out for the total acid digestion of sediments, but using 0.2 g of sediment and a final volume of 50 mL.                                                                                                                                                                     |

**Table S5.** Recoveries (%) of the CRMs used for the assessment of the accuracy of the methodology (n = 4)

| CRM         | Recovery (%) |            |                |            |
|-------------|--------------|------------|----------------|------------|
|             | Zn           | Cd         | Pb             | Cu         |
| BCR- 505    | 92.2 ± 5.1   | 88.8 ± 1.8 | No certified * | 107 ± 2    |
| SRM 1646a   | 83.3 ± 2.6   | 101 ± 1    | 94.1 ± 10.1    | 85.3 ± 0.1 |
| F1          | 94.7 ± 0.5   | 101 ± 5    | 89.5 ± 10.3    | 117 ± 9    |
| BCR- 701 F2 | 93.8 ± 4.2   | 96 ± 2     | 94.0 ± 6.2     | 73.8 ± 2.1 |
| F3          | 104 ± 11     | 110 ± 9    | 94.9 ± 6.4     | 101 ± 12   |

\* Without certified value for Pb; indicative value given: 0.05 ± 0.03; found: 0.09 ± 0.01 µg/L

**Table S6.** Comparison of log K<sub>d</sub> (L/kg) values for Zn, Cd, Pb and Cu in Algeciras with other estuaries and bays

| Site                                         | Zn          | Cd          | Pb          | Cu          | Reference  |
|----------------------------------------------|-------------|-------------|-------------|-------------|------------|
| Algeciras Bay (Spain)                        | 3.80–5.89   | 3.19–3.91   | 4.26–5.53   | 3.73–4.73   | This study |
| Port Jackson Estuary (Australia)             | 4.7–5.2     | -           | -           | 3.9–5.1     | [51]       |
| Changjiang Estuary (China)                   | 4.54–5.43   | 3.19–4.85   | 4.42–5.40   | 4.17–5.09   | [52]       |
| Yangtze Estuary (China)                      | -           | 3.7–3.9     | -           | 4.6–4.8     | [53]       |
| Huelva Estuary (Spain)                       | 3.23–4.57   | 3.15–4.73   | 3.98–5.09   | 4.15–5.04   | [54]       |
| Cadiz Bay (Spain)                            | 2.3–4.5     | 3.3–4.6     | 2.6–5.2     | 3.5–4.9     |            |
| Sagami Bay (Japan)                           | -           | 4.2–5.9     | -           | 3.8–6.2     | [46]       |
| Dakar coast and Saint Louis Estuary (Africa) | 3.21        | 3.78        | 4.17        | 4.10        | [55]       |
| Bahía Blanca Estuary (Argentina)             | -           | 2.2–5.1     | -           | 3.8–6.0     | [56]       |
| El-Mex Bay (Egypt)                           | 3.91–5.45   | N.D.–6.02   | N.D.–6.81   | 3.14–5.53   | [57]       |
| Zhanjiang Bay (China)                        | 3.81–4.61   | 4.95–5.79   | 5.02–5.95   | 3.49–4.51   | [47]       |
| Masan Bay (Korea)                            | 5.18 ± 0.52 | 4.37 ± 0.33 | 5.93 ± 0.48 | 4.47 ± 0.32 | [58]       |
| Loire Estuary (France)                       | 4.9–5.7     | 3.5–5.0     | -           | 4.1–5.0     | [59]       |
